# Supplementary material for: Harnessing the IL-21-BATF Pathway in the CD8+ T Cell Anti-Tumor Response
Source: MDPI journal article supplement (doi:10.3390/cancers13061263), 2021-03-12
Supplement: s1 [file s1]

# Supplementary Material: Harnessing the IL-21-BATF Pathway in the CD8<sup>+</sup> T Cell Anti-Tumor Response

Paytsar Topchyan, Gang Xin, Yao Chen, Shikan Zheng, Robert Burns, Jian Shen, Moujtaba Y. Kasmani, Matthew Kudek, Na Yang and Weiguo Cui

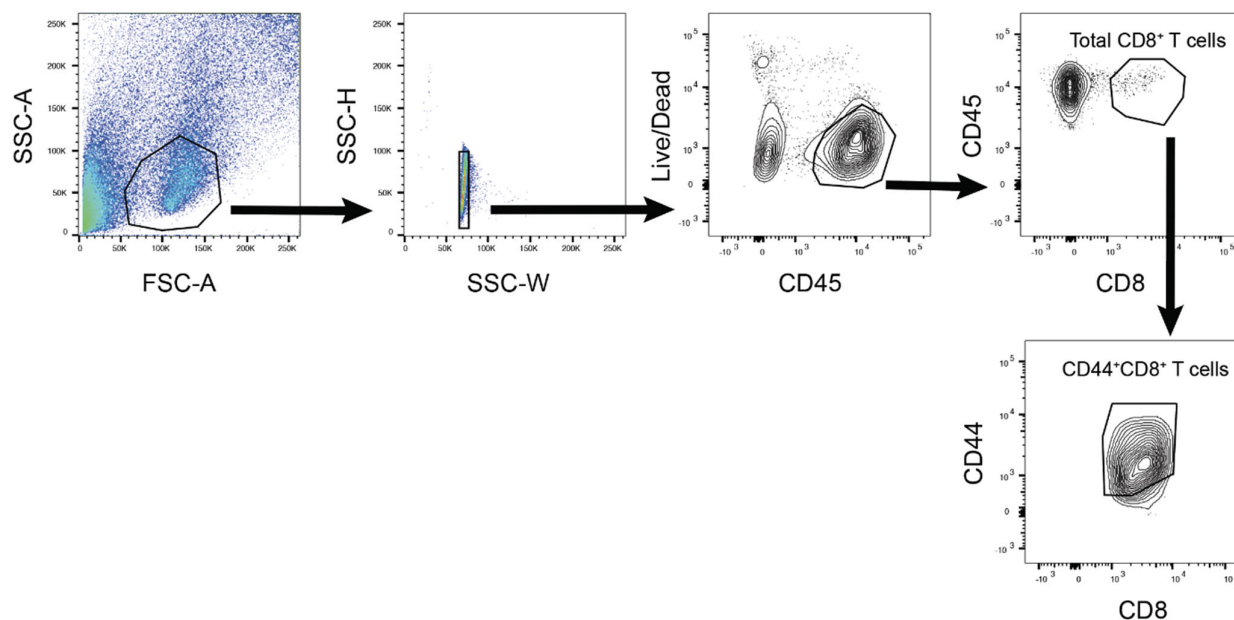

**Figure S1.** Gating strategy to assess tumor-infiltrating CD8<sup>+</sup> T cells. Tumors of B16-GP33 tumor-bearing mice were harvested and immune cells were isolated. The flow cytometry panels above depict the gating strategy used to assess the CD8<sup>+</sup> T cells in the tumor. First is the lymphocyte gate, followed by gating of single cells to exclude doublets, then gating on the live CD45<sup>+</sup> leukocyte population. Then, the total CD8 T cell population is gated within the CD45 population, followed by looking at the activated CD44<sup>+</sup> CD8<sup>+</sup> T cell population.

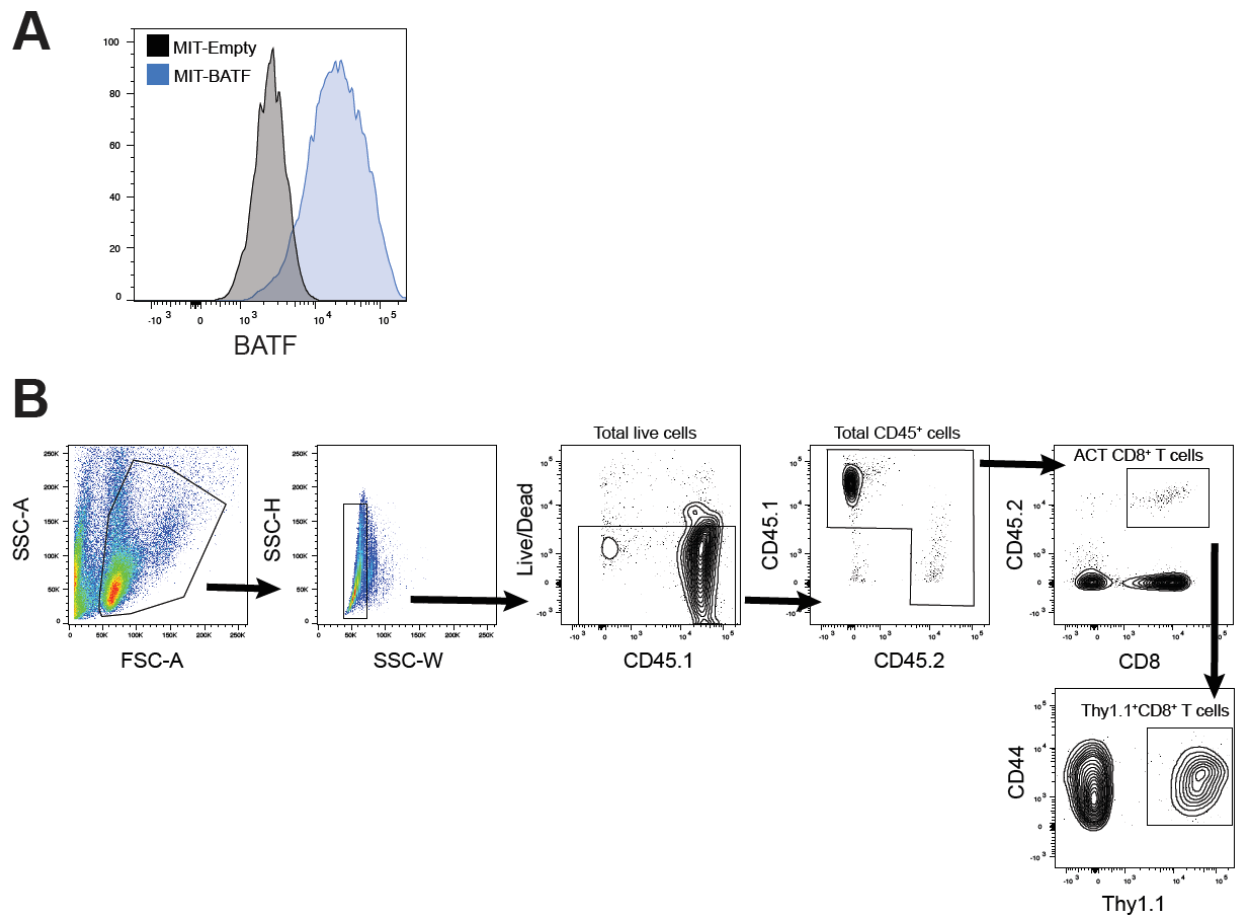

**Figure S2.** BATF retrovirally transduced CD8<sup>+</sup> T cells. Pmel CD8<sup>+</sup> T cells were activated and transduced with either MIT-Empty- or MIT-BATF-expressing retrovirus. **(A)** Forty-eight hours following transduction, flow cytometry was conducted to assess BATF expression levels in Thy1.1<sup>+</sup> CD8 T cells. **(B)** Gating strategy to assess tumor-infiltrating CD8<sup>+</sup> T cells in mice adoptively transferred with CD8 T cells retrovirally transduced with BATF. Tumors of B16-GP33 tumor-bearing mice (CD45.1 recipient mice) were harvested and immune cells were isolated. The flow cytometry panels above depict the gating strategy used to assess the CD8<sup>+</sup> T cells in the tumor. First is the lymphocyte gate, followed by gating of single cells to exclude doublets, then gating on live cells. Total CD45<sup>+</sup> cells were then selected and the adoptively transferred CD8 T cell population (CD45.2<sup>+</sup>) was selected. Thy1.1 expression of adoptively transferred cells was then assessed to identify retrovirally transduced CD8 T cells.

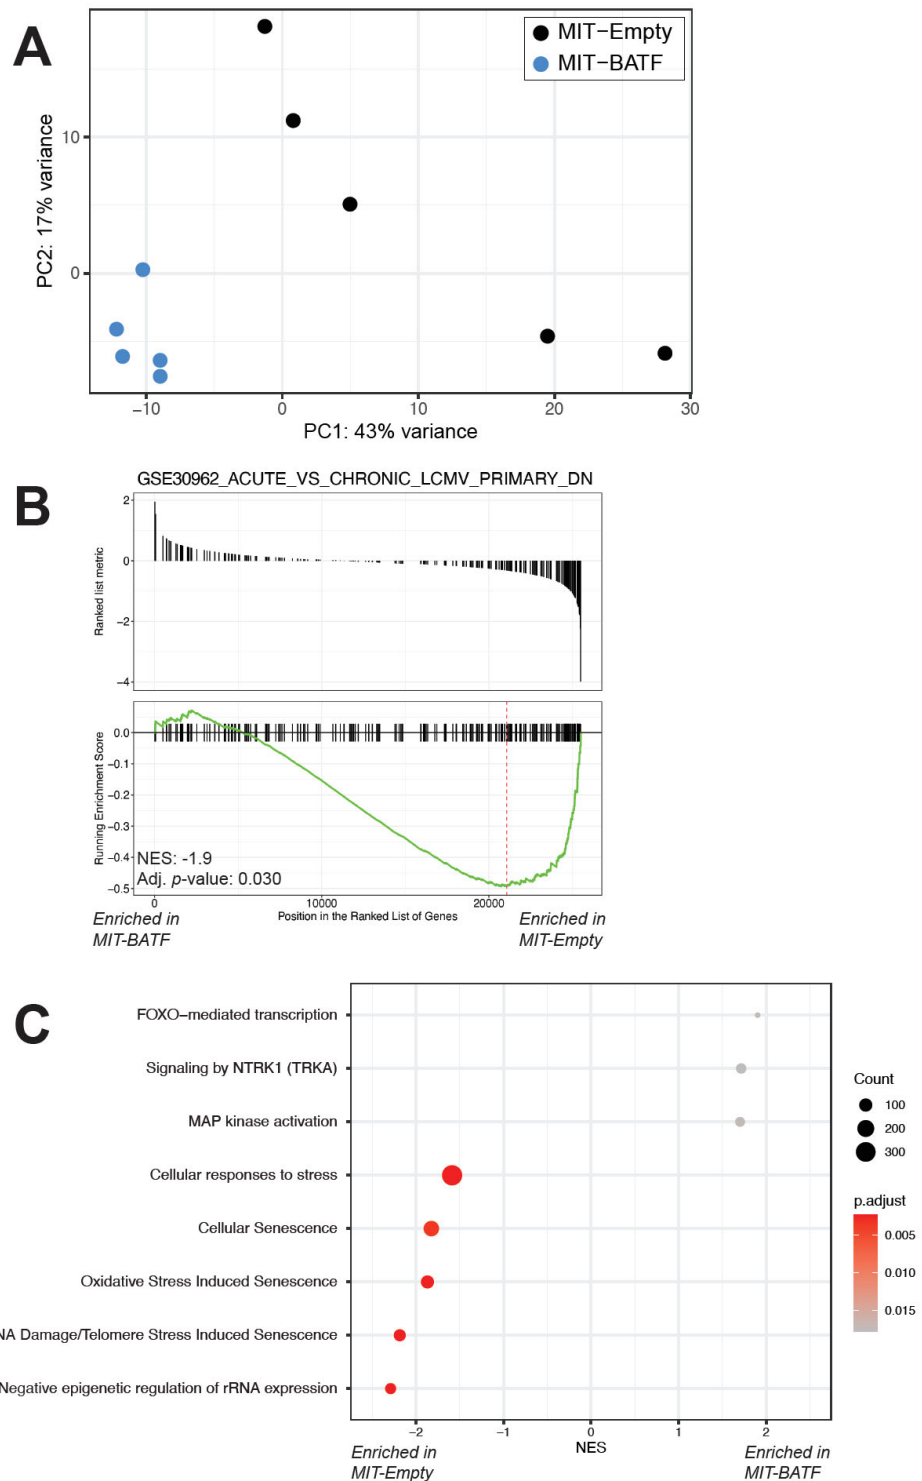

**Figure S3.** Tumor-infiltrating, adoptively transferred BATF-overexpressing CD8<sup>+</sup> T cells are more resistant to cellular Scheme 16. F10 tumor-bearing mice were adoptively transferred with CD8<sup>+</sup> T cells. One week following ACT, tumors were harvested and immune cells were isolated, stained, and FACS-sorted for Thy1.1<sup>+</sup>-expressing adoptively transferred CD8<sup>+</sup> T cells. Bulk RNA sequencing was conducted on MIT-Empty and MIT-BATF cells. (A) Principle component analysis of samples. (B) Gene set enrichment analysis (GSEA) of genes downregulated in acute vs. chronic LCMV infection. (C) Reactome pathway analysis of relevant pathways. (*n* = 5 mice per group).
